# Supplementary material for: Enhancement of dielectric permittivity and ferroelectricity of a modified cobalt nanoparticle and polyvinylidene fluoride based composite
Source: Royal Society of Chemistry journal article supplement (doi:10.1039/c4ra09292a), 2014-12-22
Supplement: c4ra09292a1.pdf [file c4ra09292a1.pdf]

## Enhancement of dielectric permittivity and ferroelectricity of modified cobalt nanoparticle and Polyvinylidene fluoride based composite

*K. Vasundhara, B. P. Mandal\*, A. K. Tyagi\**

Chemistry Division, Bhabha Atomic Research Centre, Mumbai – 400085, India

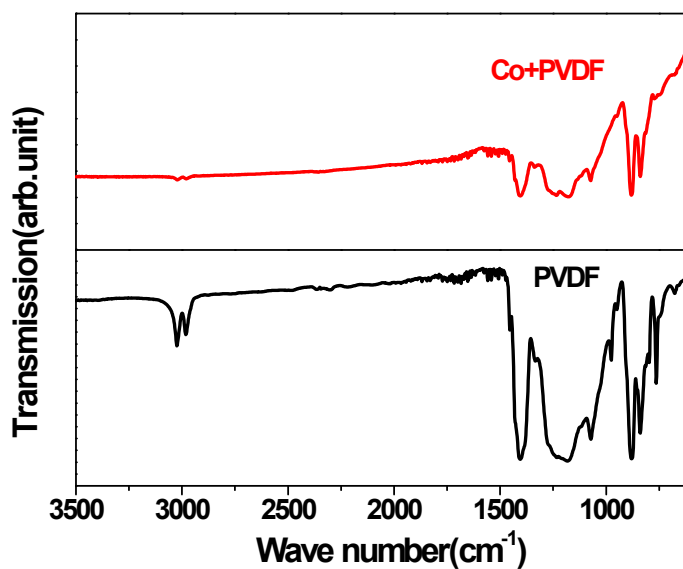

Fig S1 : FTIR of PVDF and 5% cobalt-PVDF composite

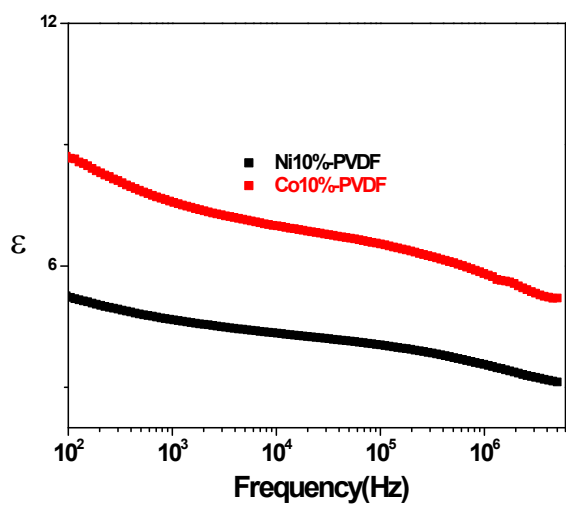

(a)

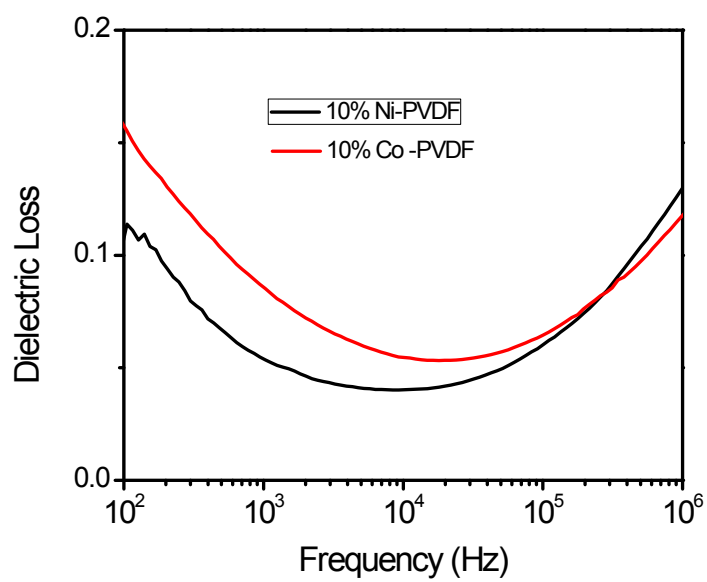

(b)

Figure S2: (a) Dielectric constant and (b) dielectric loss of 10% Ni-PVDF and 10% Co-PVDF.
